# Supplementary material for: The synthetic artificial stem cell (SASC): Shifting the paradigm of cell therapy in regenerative engineering
Source: PubMed Central journal article supplement — Proc Natl Acad Sci U S A. 2022 Jan 5;119(2):e2116865118. doi: 10.1073/pnas.2116865118 (PMC8764679; doi:10.1073/pnas.2116865118), 2022-01-05
Supplement: pnas.2116865118.sapp.pdf [file pnas.2116865118.sapp.pdf]

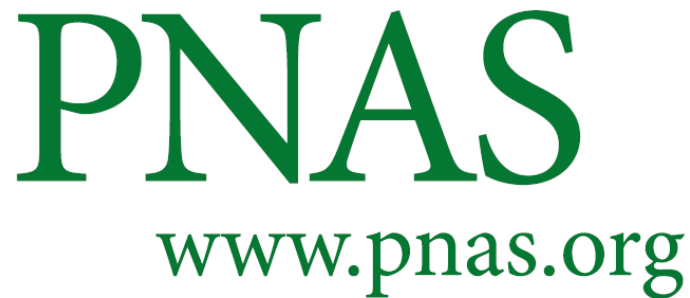

### **Supplementary Information for**

## **The Synthetic Artificial Stem Cell: Shifting the Paradigm of Cell Therapy in Regenerative Engineering**

Shiv Shah M.S.<sup>1,2,4</sup>, Caldon Jayson Esdaille<sup>1,2</sup>, Maumita Bhattacharjee Ph.D.<sup>1,2</sup>, Ho Man Kan M.Phil.<sup>1,2</sup>, Cato T. Laurencin M.D., Ph.D.<sup>1,2,3,4,5,6,7,8</sup>

1. Connecticut Convergence Institute for Translation in Regenerative Engineering, University of Connecticut Health Center, Farmington, CT
2. Raymond and Beverly Sackler Center for Biomedical, Biological, Physical and Engineering Sciences, University of Connecticut Health, Farmington, CT, USA
3. Department of Orthopaedic Surgery, University of Connecticut Health, Farmington, CT, USA
4. Department of Chemical and Biomolecular Engineering, University of Connecticut, Storrs, CT, USA
5. Department of Biomedical Engineering, University of Connecticut, Storrs, CT, USA
6. Department of Materials Science and Engineering, University of Connecticut, Storrs, CT, USA
7. Institute of Materials Science, University of Connecticut, Storrs, CT, USA
8. Department of Craniofacial Sciences, School of Dental Medicine, University of Connecticut Health, Farmington, CT, USA

#### ORCID iDs

Cato T. Laurencin <http://orcid.org/0000-0001-6765-3047>

Shiv Shah <https://orcid.org/0000-0003-3490-9266>

Caldon J, Esdaille <https://orcid.org/0000-0002-9425-4954>

**Corresponding Author:**

Cato T. Laurencin, MD PhD

Connecticut Convergence Institute for Translation in Regenerative Engineering

University of Connecticut Health Center

263 Farmington Avenue

Farmington, CT 06030-3711

[laurencin@uchc.edu](mailto:laurencin@uchc.edu)

**This PDF file includes:**

Supplementary text

Figure S1

Tables S1 to S7 (not allowed for Brief Reports)

**Supplementary Information Text****Supplementary Methods****Adipose Derived Stem Cell (ADSC) Characterization by Flow Cytometry**

Isolated ADSCs were characterized by flow cytometry using cell surface markers (Becton–Dickinson LSR II, BD Biosciences, USA) at passage 3 (P3). Cells were washed using sterile PBS, centrifuged and re-suspended in sterile Fluorescence –Activated Cell Sorting (FACS) buffer (PBS, 1% FBS) containing 10 µL of the FITC-conjugated CD29 antibody, Fluorescein isothiocyanate (FITC) conjugated CD90 antibody, FITC conjugated CD34, FITC conjugated CD45, and PE conjugated CD11b for 30 min. Unlabeled cells were used as controls. Cells were then scanned with FACS; acquired and gated using forward scatter (FSC) and side scatter (SSC) parameters to exclude cell debris and aggregates.

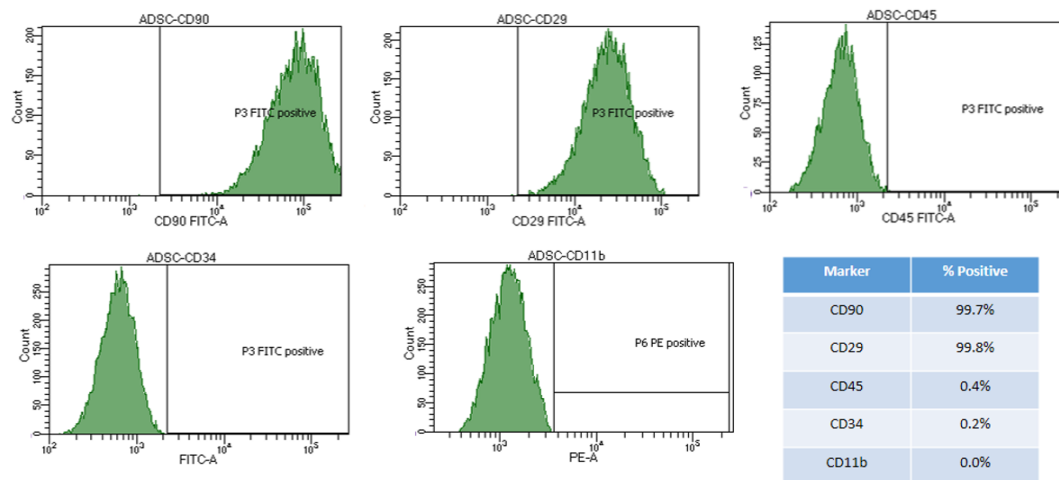

**Fig. S1.** Flow Cytometry Showing stemness of Isolated ADSCs

**Table S1.** Nitric Oxide % of IL-1 $\beta$  ANOVA Summary

| Source                                                                | DF                  | Adj SS           | Adj MS             | F-Value | P-Value          |
|-----------------------------------------------------------------------|---------------------|------------------|--------------------|---------|------------------|
| Group                                                                 | 4                   | 533932           | 133483             | 974.32  | 0                |
| Error                                                                 | 251                 | 34387            | 137                |         |                  |
| Total                                                                 | 255                 | 568319           |                    |         |                  |
| <b>Grouping Information Using the Tukey Method and 95% Confidence</b> |                     |                  |                    |         |                  |
| Group                                                                 | N                   | Mean             | Grouping           |         |                  |
| ADSC                                                                  | 47                  | 104.69           | A                  |         |                  |
| Blank MS                                                              | 23                  | 104.12           | A                  |         |                  |
| IL-1B                                                                 | 66                  | 100              | A                  |         |                  |
| SASC                                                                  | 60                  | 76.64            |                    | B       |                  |
| Untreated                                                             | 60                  | -10.474          |                    |         | C                |
| Means that do not share a letter are significantly different.         |                     |                  |                    |         |                  |
|                                                                       |                     |                  |                    |         |                  |
| Difference of Levels                                                  | Difference of Means | SE of Difference | 95% CI             | T-Value | Adjusted P-Value |
| Blank MS - ADSC                                                       | -0.57               | 2.98             | (-8.70, 7.56)      | -0.19   | 1                |
| IL-1B - ADSC                                                          | -4.69               | 2.23             | (-10.79, 1.41)     | -2.1    | 0.22             |
| SASC - ADSC                                                           | -28.05              | 2.28             | (-34.28, -21.83)   | -12.3   | 0                |
| Untreated - ADSC                                                      | -115.16             | 2.28             | (-121.39, -108.94) | -50.51  | 0                |
| IL-1B - Blank MS                                                      | -4.12               | 2.83             | (-11.85, 3.62)     | -1.45   | 0.593            |
| SASC - Blank MS                                                       | -27.48              | 2.87             | (-35.32, -19.65)   | -9.57   | 0                |
| Untreated - Blank MS                                                  | -114.59             | 2.87             | (-122.43, -106.76) | -39.92  | 0                |
| SASC - IL-1B                                                          | -23.36              | 2.09             | (-29.06, -17.67)   | -11.19  | 0                |
| Untreated - IL-1B                                                     | -110.47             | 2.09             | (-116.17, -104.78) | -52.91  | 0                |
| Untreated - SASC                                                      | -87.11              | 2.14             | (-92.94, -81.28)   | -40.76  | 0                |
| Individual confidence level = 99.32%                                  |                     |                  |                    |         |                  |
| Tukey Simultaneous 95% CIs                                            |                     |                  |                    |         |                  |

**Table S2.** SOX9 Fold Change ANOVA Summary

| Source                                                                | DF                         | Adj SS                  | Adj MS            | F-Value        | P-Value                 |
|-----------------------------------------------------------------------|----------------------------|-------------------------|-------------------|----------------|-------------------------|
| Group                                                                 | 4                          | 6.3515                  | 1.58786           | 133.93         | 0                       |
| Error                                                                 | 55                         | 0.6521                  | 0.01186           |                |                         |
| Total                                                                 | 59                         | 7.0035                  |                   |                |                         |
| <b>Tukey Pairwise Comparisons</b>                                     |                            |                         |                   |                |                         |
| <b>Grouping Information Using the Tukey Method and 95% Confidence</b> |                            |                         |                   |                |                         |
|                                                                       |                            |                         |                   |                |                         |
| Group                                                                 | N                          | Mean                    | Grouping          |                |                         |
| Untreated                                                             | 15                         | 1.0148                  | A                 |                |                         |
| SASC                                                                  | 12                         | 0.4038                  |                   | B              |                         |
| IL-1B                                                                 | 15                         | 0.2384                  |                   |                | C                       |
| Blank MS                                                              | 9                          | 0.2312                  |                   |                | C                       |
| ADSC                                                                  | 9                          | 0.227                   |                   |                | C                       |
| Means that do not share a letter are significantly different.         |                            |                         |                   |                |                         |
| <b>Tukey Simultaneous Tests for Differences of Means</b>              |                            |                         |                   |                |                         |
| <b>Difference of Levels</b>                                           | <b>Difference of Means</b> | <b>SE of Difference</b> | <b>95% CI</b>     | <b>T-Value</b> | <b>Adjusted P-Value</b> |
| Blank MS - ADSC                                                       | 0.0042                     | 0.0513                  | (-0.1406, 0.1490) | 0.08           | 1                       |
| IL-1B - ADSC                                                          | 0.0113                     | 0.0459                  | (-0.1182, 0.1408) | 0.25           | 0.999                   |
| SASC - ADSC                                                           | 0.1768                     | 0.048                   | (0.0413, 0.3122)  | 3.68           | 0.005                   |
| Untreated - ADSC                                                      | 0.7878                     | 0.0459                  | (0.6583, 0.9173)  | 17.16          | 0                       |
| IL-1B - Blank MS                                                      | 0.0071                     | 0.0459                  | (-0.1224, 0.1367) | 0.16           | 1                       |
| SASC - Blank MS                                                       | 0.1726                     | 0.048                   | (0.0371, 0.3081)  | 3.59           | 0.006                   |
| Untreated - Blank MS                                                  | 0.7836                     | 0.0459                  | (0.6541, 0.9132)  | 17.07          | 0                       |

|                                      |        |        |                  |       |       |
|--------------------------------------|--------|--------|------------------|-------|-------|
| SASC - IL-1B                         | 0.1654 | 0.0422 | (0.0465, 0.2844) | 3.92  | 0.002 |
| Untreated - IL-1B                    | 0.7765 | 0.0398 | (0.6643, 0.8886) | 19.53 | 0     |
| Untreated - SASC                     | 0.611  | 0.0422 | (0.4920, 0.7300) | 14.49 | 0     |
| Individual confidence level = 99.34% |        |        |                  |       |       |
| Tukey Simultaneous 95% CIs           |        |        |                  |       |       |

**Table S3.** ADAMTS5 Fold Change ANOVA Summary.

| Source                                                                | DF                  | Adj SS           | Adj MS           | F-Value | P-Value          |
|-----------------------------------------------------------------------|---------------------|------------------|------------------|---------|------------------|
| Group                                                                 | 4                   | 77.8             | 19.4493          | 19.49   | 0                |
| Error                                                                 | 51                  | 50.89            | 0.9978           |         |                  |
| Total                                                                 | 55                  | 128.69           |                  |         |                  |
| <b>Tukey Pairwise Comparisons</b>                                     |                     |                  |                  |         |                  |
| <b>Grouping Information Using the Tukey Method and 95% Confidence</b> |                     |                  |                  |         |                  |
|                                                                       |                     |                  |                  |         |                  |
| Group                                                                 | N                   | Mean             | Grouping         |         |                  |
| Blank MS                                                              | 3                   | 5.0767           | A                |         |                  |
| IL-1B                                                                 | 15                  | 3.723            | A                |         |                  |
| SASC                                                                  | 14                  | 2.593            |                  | B       |                  |
| ADSC                                                                  | 9                   | 2.055            |                  | B       | C                |
| Untreated                                                             | 15                  | 1.0045           |                  |         | C                |
| Means that do not share a letter are significantly different.         |                     |                  |                  |         |                  |
|                                                                       |                     |                  |                  |         |                  |
| <b>Tukey Simultaneous Tests for Differences of Means</b>              |                     |                  |                  |         |                  |
| Difference of Levels                                                  | Difference of Means | SE of Difference | 95% CI           | T-Value | Adjusted P-Value |
| Blank MS - ADSC                                                       | 3.022               | 0.666            | (1.138, 4.906)   | 4.54    | 0                |
| IL-1B - ADSC                                                          | 1.668               | 0.421            | (0.477, 2.860)   | 3.96    | 0.002            |
| SASC - ADSC                                                           | 0.539               | 0.427            | (-0.668, 1.746)  | 1.26    | 0.715            |
| Untreated - ADSC                                                      | -1.05               | 0.421            | (-2.242, 0.141)  | -2.49   | 0.108            |
| IL-1B - Blank MS                                                      | -1.354              | 0.632            | (-3.141, 0.433)  | -2.14   | 0.218            |
| SASC - Blank MS                                                       | -2.483              | 0.636            | (-4.281, -0.686) | -3.91   | 0.002            |
| Untreated - Blank MS                                                  | -4.072              | 0.632            | (-5.859, -2.285) | -6.45   | 0                |

|                                      |        |       |                  |       |       |
|--------------------------------------|--------|-------|------------------|-------|-------|
| SASC - IL-1B                         | -1.13  | 0.371 | (-2.180, -0.080) | -3.04 | 0.029 |
| Untreated - IL-1B                    | -2.719 | 0.365 | (-3.750, -1.687) | -7.45 | 0     |
| Untreated - SASC                     | -1.589 | 0.371 | (-2.639, -0.539) | -4.28 | 0.001 |
| Individual confidence level = 99.33% |        |       |                  |       |       |
| Tukey Simultaneous 95% CIs           |        |       |                  |       |       |



**Table S4.** PRG4 Fold Change ANOVA Summary

| Source                                                                | DF                         | Adj SS                  | Adj MS           | F-Value        | P-Value                 |
|-----------------------------------------------------------------------|----------------------------|-------------------------|------------------|----------------|-------------------------|
| Group                                                                 | 4                          | 571508                  | 142877           | 101.63         | 0                       |
| Error                                                                 | 19                         | 26710                   | 1406             |                |                         |
| Total                                                                 | 23                         | 598218                  |                  |                |                         |
| <b>Tukey Pairwise Comparisons</b>                                     |                            |                         |                  |                |                         |
| <b>Grouping Information Using the Tukey Method and 95% Confidence</b> |                            |                         |                  |                |                         |
|                                                                       |                            |                         |                  |                |                         |
| Group                                                                 | N                          | Mean                    | Grouping         |                |                         |
| ADSC                                                                  | 3                          | 392.9                   | A                |                |                         |
| IL-1B                                                                 | 6                          | 377.39                  | A                |                |                         |
| Blank MS                                                              | 3                          | 308.1                   | A                |                |                         |
| SASC                                                                  | 6                          | 159.1                   |                  | B              |                         |
| Untreated                                                             | 6                          | 1.0063                  |                  |                | C                       |
| Means that do not share a letter are significantly different.         |                            |                         |                  |                |                         |
| <b>Tukey Simultaneous Tests for Differences of Means</b>              |                            |                         |                  |                |                         |
| <b>Difference of Levels</b>                                           | <b>Difference of Means</b> | <b>SE of Difference</b> | <b>95% CI</b>    | <b>T-Value</b> | <b>Adjusted P-Value</b> |
| Blank MS - ADSC                                                       | -84.7                      | 30.6                    | (-176.7, 7.3)    | -2.77          | 0.08                    |
| IL-1B - ADSC                                                          | -15.5                      | 26.5                    | (-95.1, 64.2)    | -0.58          | 0.976                   |
| SASC - ADSC                                                           | -233.8                     | 26.5                    | (-313.5, -154.1) | -8.82          | 0                       |
| Untreated - ADSC                                                      | -391.8                     | 26.5                    | (-471.5, -312.2) | -14.78         | 0                       |
| IL-1B - Blank MS                                                      | 69.3                       | 26.5                    | (-10.4, 149.0)   | 2.61           | 0.108                   |
| SASC - Blank MS                                                       | -149.1                     | 26.5                    | (-228.7, -69.4)  | -5.62          | 0                       |
| Untreated - Blank MS                                                  | -307.1                     | 26.5                    | (-386.8, -227.4) | -11.58         | 0                       |

|                                      |        |      |                  |        |   |
|--------------------------------------|--------|------|------------------|--------|---|
| SASC - IL-1B                         | -218.3 | 21.6 | (-283.4, -153.3) | -10.09 | 0 |
| Untreated - IL-1B                    | -376.4 | 21.6 | (-441.4, -311.3) | -17.39 | 0 |
| Untreated - SASC                     | -158   | 21.6 | (-223.1, -93.0)  | -7.3   | 0 |
| Individual confidence level = 99.27% |        |      |                  |        |   |
| Tukey Simultaneous 95% CIs           |        |      |                  |        |   |

**Table S5.** % Degenerated Area ANOVA Summary

| Source                                                                | DF                  | Adj SS           | Adj MS          | F-Value | P-Value          |
|-----------------------------------------------------------------------|---------------------|------------------|-----------------|---------|------------------|
| Group                                                                 | 4                   | 3169             | 792.17          | 9.63    | 0                |
| Error                                                                 | 20                  | 1645             | 82.24           |         |                  |
| Total                                                                 | 24                  | 4814             |                 |         |                  |
| <b>Tukey Pairwise Comparisons</b>                                     |                     |                  |                 |         |                  |
| <b>Grouping Information Using the Tukey Method and 95% Confidence</b> |                     |                  |                 |         |                  |
| Group                                                                 | N                   | Mean             | Grouping        |         |                  |
| OA                                                                    | 5                   | 33.75            | A               |         |                  |
| Blank                                                                 | 5                   | 30.61            | A               |         |                  |
| ADSC                                                                  | 5                   | 10.62            |                 | B       |                  |
| SASC                                                                  | 5                   | 10.03            |                 | B       |                  |
| Healthy                                                               | 5                   | 7.53             |                 | B       |                  |
| Means that do not share a letter are significantly different.         |                     |                  |                 |         |                  |
| <b>Tukey Simultaneous Tests for Differences of Means</b>              |                     |                  |                 |         |                  |
| Difference of Levels                                                  | Difference of Means | SE of Difference | 95% CI          | T-Value | Adjusted P-Value |
| Blank - ADSC                                                          | 19.99               | 5.74             | (2.84, 37.15)   | 3.49    | 0.018            |
| Healthy - ADSC                                                        | -3.09               | 5.74             | (-20.25, 14.06) | -0.54   | 0.982            |
| OA - ADSC                                                             | 23.13               | 5.74             | (5.98, 40.29)   | 4.03    | 0.005            |
| SASC - ADSC                                                           | -0.6                | 5.74             | (-17.75, 16.56) | -0.1    | 1                |
| Healthy - Blank                                                       | -23.09              | 5.74             | (-40.24, -5.93) | -4.03   | 0.005            |
| OA - Blank                                                            | 3.14                | 5.74             | (-14.02, 20.29) | 0.55    | 0.981            |
| SASC - Blank                                                          | -20.59              | 5.74             | (-37.74, -3.43) | -3.59   | 0.014            |
| OA - Healthy                                                          | 26.23               | 5.74             | (9.07, 43.38)   | 4.57    | 0.002            |

|                                      |        |      |                 |       |       |
|--------------------------------------|--------|------|-----------------|-------|-------|
| SASC - Healthy                       | 2.5    | 5.74 | (-14.66, 19.65) | 0.44  | 0.992 |
| SASC - OA                            | -23.73 | 5.74 | (-40.88, -6.57) | -4.14 | 0.004 |
| Individual confidence level = 99.28% |        |      |                 |       |       |
| Tukey Simultaneous 95% CIs           |        |      |                 |       |       |

**Table S6.** Tibial Young's Modulus Linear Mixed Effects Model Summary

| Term                                                                  | DF Num              | DF Den           | F-Value  | P-Value             |         |                  |
|-----------------------------------------------------------------------|---------------------|------------------|----------|---------------------|---------|------------------|
| Group                                                                 | 4                   | 627.05           | 35.81    | 0                   |         |                  |
| <b>Tukey Pairwise Comparisons: Group</b>                              |                     |                  |          |                     |         |                  |
| <b>Grouping Information Using the Tukey Method and 95% Confidence</b> |                     |                  |          |                     |         |                  |
| Group                                                                 | N                   | Mean             | Grouping |                     |         |                  |
| Healthy                                                               | 131                 | 1.79277          | A        |                     |         |                  |
| SASC                                                                  | 132                 | 1.41259          |          | B                   |         |                  |
| ADSC                                                                  | 132                 | 1.35554          |          | B                   |         |                  |
| Blank                                                                 | 132                 | 1.05128          |          |                     | C       |                  |
| OA                                                                    | 131                 | 0.96371          |          |                     | C       |                  |
| Means that do not share a letter are significantly different.         |                     |                  |          |                     |         |                  |
| <b>Tukey Simultaneous Tests for Differences of Means</b>              |                     |                  |          |                     |         |                  |
| Difference of Group Levels                                            | Difference of Means | SE of Difference | DF       | Simultaneous 95% CI | T-Value | Adjusted P-Value |
| Blank - ADSC                                                          | -0.3043             | 0.0774           | 627.022  | (-0.5161, -0.0924)  | -3.93   | 0.001            |
| Healthy - ADSC                                                        | 0.4372              | 0.0776           | 627.059  | (0.2249, 0.6495)    | 5.63    | 0                |
| OA - ADSC                                                             | -0.3918             | 0.0776           | 627.059  | (-0.6041, -0.1795)  | -5.05   | 0                |
| SASC - ADSC                                                           | 0.0571              | 0.0774           | 627.022  | (-0.1548, 0.2689)   | 0.74    | 0.948            |
| Healthy - Blank                                                       | 0.7415              | 0.0776           | 627.059  | (0.5292, 0.9538)    | 9.56    | 0                |
| OA - Blank                                                            | -0.0876             | 0.0776           | 627.059  | (-0.2999, 0.1247)   | -1.13   | 0.791            |
| SASC - Blank                                                          | 0.3613              | 0.0774           | 627.022  | (0.1494, 0.5732)    | 4.67    | 0                |
| OA - Healthy                                                          | -0.8291             | 0.0778           | 627.105  | (-1.0418, -0.6163)  | -10.66  | 0                |
| SASC - Healthy                                                        | -0.3802             | 0.0776           | 627.059  | (-0.5925, -0.1679)  | -4.9    | 0                |
| SASC - OA                                                             | 0.4489              | 0.0776           | 627.059  | (0.2366, 0.6612)    | 5.78    | 0                |

|                                      |  |  |  |  |  |  |
|--------------------------------------|--|--|--|--|--|--|
| Individual confidence level = 99.36% |  |  |  |  |  |  |
| Tukey Simultaneous 95% CIs           |  |  |  |  |  |  |

**Table S7.** Femoral Young's Modulus Linear Mixed Effects Model Summary

| Term                                                                  | DF Num              | DF Den           | F-Value  | P-Value             |         |                  |
|-----------------------------------------------------------------------|---------------------|------------------|----------|---------------------|---------|------------------|
| Group                                                                 | 4                   | 320.09           | 28.86    | 0                   |         |                  |
| <b>Tukey Pairwise Comparisons: Group</b>                              |                     |                  |          |                     |         |                  |
| <b>Grouping Information Using the Tukey Method and 95% Confidence</b> |                     |                  |          |                     |         |                  |
| Group                                                                 | N                   | Mean             | Grouping |                     |         |                  |
| Healthy                                                               | 72                  | 3.61372          | A        |                     |         |                  |
| ADSC                                                                  | 68                  | 3.00305          |          | B                   |         |                  |
| SASC                                                                  | 70                  | 2.34487          |          |                     | C       |                  |
| OA                                                                    | 65                  | 1.69795          |          |                     |         | D                |
| Blank                                                                 | 65                  | 1.69002          |          |                     |         | D                |
| Means that do not share a letter are significantly different.         |                     |                  |          |                     |         |                  |
| <b>Tukey Simultaneous Tests for Differences of Means</b>              |                     |                  |          |                     |         |                  |
| Difference of Group Levels                                            | Difference of Means | SE of Difference | DF       | Simultaneous 95% CI | T-Value | Adjusted P-Value |
| Blank - ADSC                                                          | -1.313              | 0.224            | 320.763  | (-1.928, -0.698)    | -5.85   | 0                |
| Healthy - ADSC                                                        | 0.611               | 0.218            | 319.596  | (0.012, 1.210)      | 2.8     | 0.043            |
| OA - ADSC                                                             | -1.305              | 0.224            | 320.812  | (-1.921, -0.690)    | -5.82   | 0                |
| SASC - ADSC                                                           | -0.658              | 0.22             | 319.848  | (-1.262, -0.055)    | -2.99   | 0.025            |
| Healthy - Blank                                                       | 1.924               | 0.221            | 320.143  | (1.317, 2.530)      | 8.7     | 0                |
| OA - Blank                                                            | 0.008               | 0.227            | 320.66   | (-0.614, 0.630)     | 0.03    | 1                |
| SASC - Blank                                                          | 0.655               | 0.223            | 320.552  | (0.044, 1.266)      | 2.94    | 0.029            |
| OA - Healthy                                                          | -1.916              | 0.221            | 319.751  | (-2.522, -1.310)    | -8.67   | 0                |
| SASC - Healthy                                                        | -1.269              | 0.217            | 319.013  | (-1.863, -0.675)    | -5.86   | 0                |
| SASC - OA                                                             | 0.647               | 0.222            | 319.855  | (0.037, 1.257)      | 2.91    | 0.032            |

|                                      |  |  |  |  |  |  |
|--------------------------------------|--|--|--|--|--|--|
| Individual confidence level = 99.36% |  |  |  |  |  |  |
| Tukey Simultaneous 95% CIs           |  |  |  |  |  |  |
